# Supplementary material for: Photo-induced ring-expansion reactions mediated by B12-TiO2 hybrid catalyst
Source: Royal Society of Chemistry journal article supplement (doi:10.1039/b921802e), 2010-01-01
Supplement: b921802e.pdf [file b921802e.pdf]

**SUPPORTING INFORMATION FOR:**

**Photo-Induced Ring-Expansion Reactions  
Mediated by B<sub>12</sub>-TiO<sub>2</sub> hybrid catalyst**

**Shin-ichiro Izumi, Hisashi Shimakoshi, Masaaki Abe and Yoshio Hisaeda\***

*Department of Chemistry and Biochemistry, Graduate School of Engineering,  
Kyushu University, Fukuoka 819-0395, Japan*

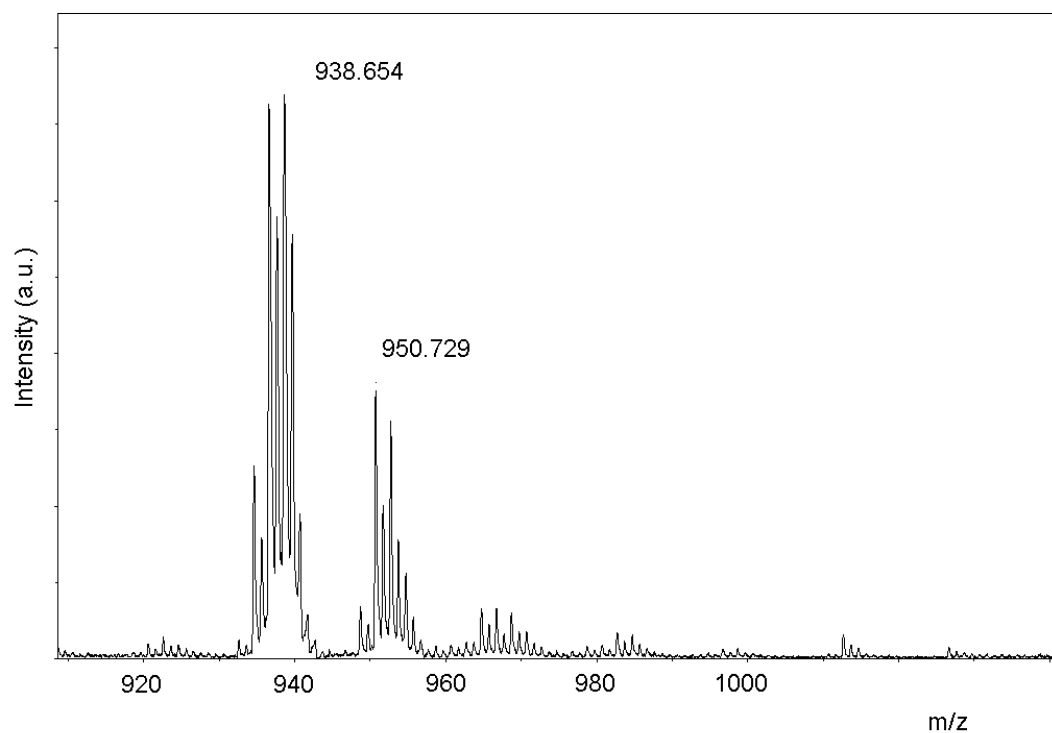

**Fig. S1** MALDI-TOF mass spectrum for **B<sub>12</sub>-TiO<sub>2</sub>** (matrix: dithranol)

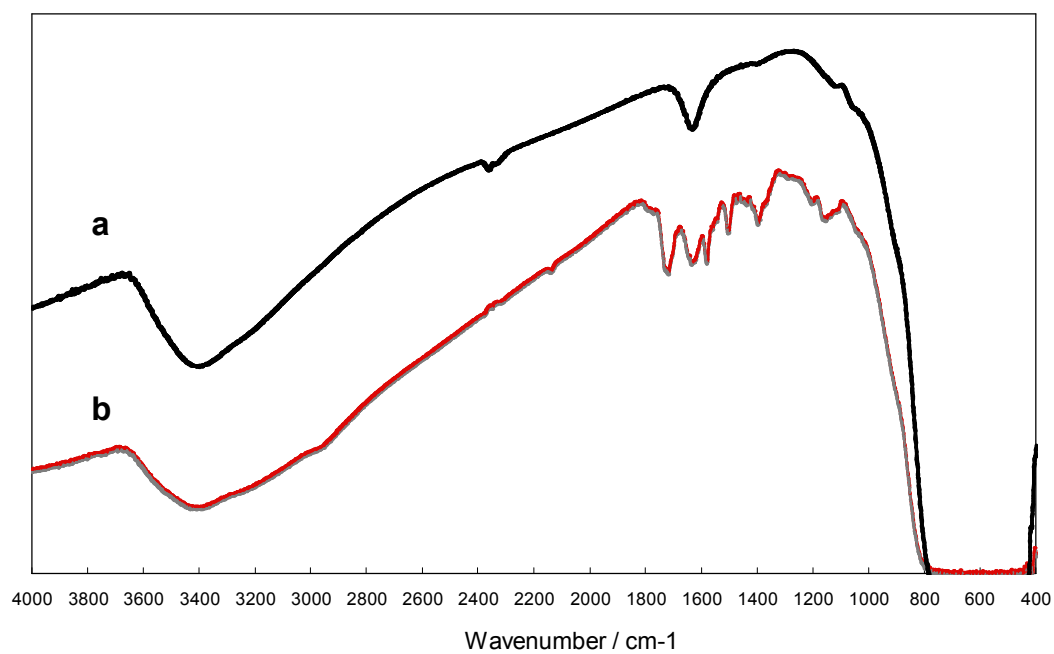

**Fig. S2** FT-IR spectra for a) TiO<sub>2</sub> (black line) and b) **B<sub>12</sub>-TiO<sub>2</sub>** (red line)

## Solvent effect

In addition to efficiency of hole scavenge, solvent viscosity also may influence the catalytic efficiency. In fact, solvent viscosity may influence the diffusion of substrate, catalyst according to Stokes-Einstein equation shown in equation S1.

$$D = k_B T / 6\pi r \eta \quad (\text{S1})$$

Where  $D$  is the diffusion coefficient and  $k_B$  is Boltzmann constant and  $r$  is the radius of the diffusing species. Brezova and co-workers found the correlation between rate constants of photocatalytic reduction and solvent viscosity.<sup>S1</sup> Indeed, the decay of the concentration of substrate **5a**, shown in Fig. 6, was found to be fitted to the exponential function in equation S2 kinetics as shown in Fig. S3, indicative of the first-order kinetics.

$$[\text{Substrate}] = A + B \cdot \exp(-k \cdot t) \quad (\text{S2})$$

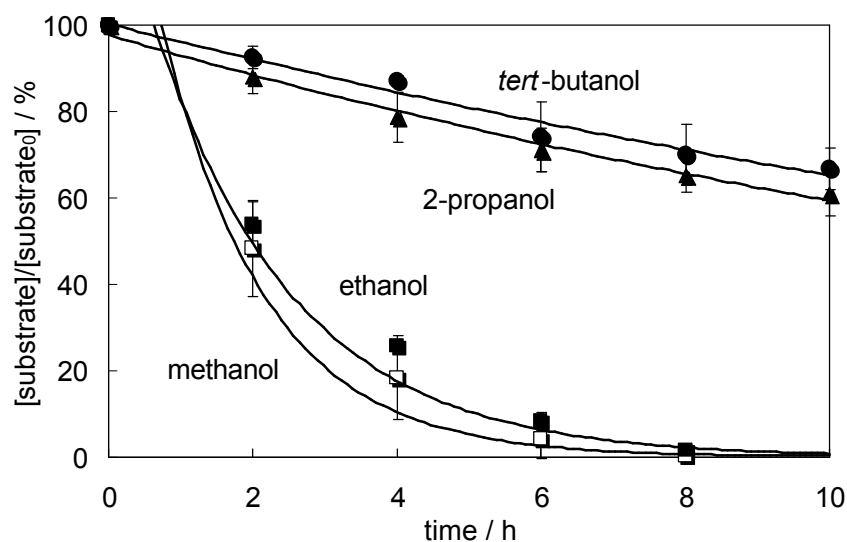

**Fig. S3** concentration of substrate-time plot and kinetic curve fitting.  $\square$  methanol ( $y = 166.84\exp(-0.6941x)$ ),  $\blacksquare$  ethanol ( $y = 138.56\exp(-0.5161x)$ ),  $\blacktriangle$  2-propanol ( $y = 97.692\exp(-0.0498x)$ ),  $\circ$  tert-butanol ( $y = 100.3\exp(-0.043x)$ ).

where  $k$  is the catalytic rate constant. Linear dependence on  $k$  versus  $1/\eta$  (Fig. S4) suggests that viscosity  $\eta$  (Table S1) is another possible coefficient to determine catalytic efficiencies.

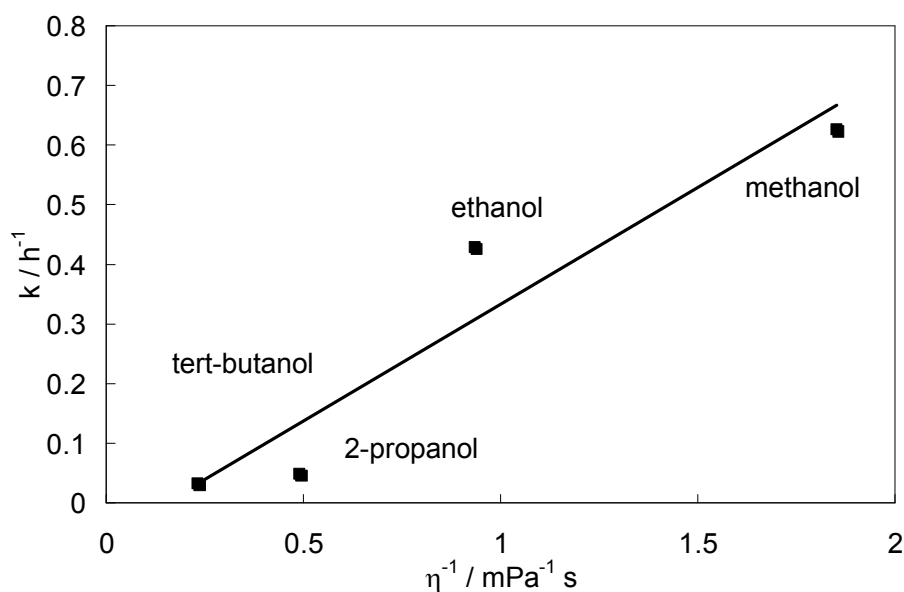

**Fig. S4** Linear dependence on  $k$  versus  $1/\eta$ .

**Table S1** Viscosity of various alcohols

| Solvent      | $\eta$ / mPa s <sup>a</sup> |
|--------------|-----------------------------|
| methanol     | 0.54                        |
| ethanol      | 1.07                        |
| 2-propanol   | 2.04                        |
| tert-butanol | 4.31                        |

<sup>a</sup> viscosity at 25°C, see ref. S2

## References

- S1) V. Brezová, B. Blazková, I. Surina and B. Havlíková, *J. Photochem. Photobiol., A*, 1997, **107**, 233-237.
- S2) *Handbook of Chemistry and Physics*, ed. D. R. Lide, CRC, Boca Raton, 74<sup>th</sup> edn., 1993 -1994. pp. 6-193.
